# Supplementary material for: Evaluating the technical efficiency of neonatal health service among primary hospitals of northwest Ethiopia: Using two-stage data envelopment analysis and Tobit regression model
Source: PLoS One. 2022 Nov 17;17(11):e0277826. doi: 10.1371/journal.pone.0277826 (PMC9671419; doi:10.1371/journal.pone.0277826)
Supplement: S1 File — (XLSX) [file pone.0277826.s001.xlsx]

## Sheet: Data for primary hospitals
ID	Service_year	Total_catchement_population	Total_neonatal_catchement_population	Availability_of_health_facility_near_to_the_hospital	Distance_of_the_health_facility_in_km	The_type_of_health_facility	Distance_of_the_hospital_from_the_district_city	Sex_of_the_head_of_the_hospital	Age_of_the_head_of_the_hospital	Qualification_of_the_head_of_the_hospital	Service_year_of_the_head	Distance_of_the_CEO_residence_to_the_hospital	Availability_of_additional_payements	Availability_of_incentives	Average_waiting_time	The_main_source_of_finance	Government	NGO	Internal_revenue	Other	Total_budget	Total_budget_excluding_salary	Total_expenditure	Total_expenditure_excluding_salary	Yearly_expenditure_for_recurrent_materiales	Yearly_expenditure_for_capital_items	Yearly_expenditure_for_salary	Yearly_expenditure_for_duty	Stationary	Telephone_service	Electricity	Water	Building_maintainance	Gasoline	Total_for_adminstraive_and_maintainance	Drugs_and_medical_supplies	Adminstrative_staffs	Clinical_staffs	Clinical_staffs_for_only_neonatal_health_services	Total_expenditure_for_all_staffs	Total_beds_in_the_hospital	Beds_for_only_neonatal_health_services	Total_number_of_patients_addmitted	Total_number_of_neonates_addmitted	Total_number_of_patients_who_got_out_patient_services	Total_number_of_neonates_who_got_out_patient_services	Total_number_of_clients_who_recieved_refferal_services	Total_number_of_neonates_who_recieved_refferal_services	sum of neonatal health services
1	5	300000	10110	1	7	4	7	1	33	2	6	3	2	2	5	1	3.65979e+07	0	8869121	0	4.5467e+07	3.33395e+07	3.92223e+07	2.70948e+07	5.64386e+06	3.84257e+07	1.21275e+07	1.20608e+07	662420	100000	63058.9	34825.1	108347	374470	1.34312e+06	4.30074e+06	70	118	3	1.21275e+07	59	9	2730	404	104580	354	1605	64	822
2	7	640000	21568	1	43	5	98	1	29	2	6	0.5	1	1	20	1	20456621	0	8000000	0	28456621	11424160	27520612	10820180	7310482	0	15820514	4314375	430214	201340	170520	230540	0	621436	1654050	5656432	72	131	5	17210121	46	7	2146	341	52245	240	4010	179	760
3	6	300000	10110	1	16	3	40	1	40	2	5	3	2	2	25	1	21436816	0	7000000	0	28436816	10384260	28436816	10384260	5642514	0	16735644	3938385	420000	191431	168342	291450	0	461291	1532514	4110000	79	141	1	18052556	43	6	1918	192	57425	250	1555	21	463
4	5	500000	16850	1	1	2	99	1	35	2	2	1	2	1	15	1	22162144	0	7000000	0	29162144	3614432	2.20155e+07	6.9579e+06	3.26369e+06	350311	1.06638e+07	5.77099e+06	182307	59384.7	92095.9	46059.8	205646	589813	1.17527e+06	5.78263e+06	64	131	2	1.84014e+07	35	8	2160	511	65637	169	3329	165	845
5	6	166750	5619	1	10	3	97	1	28	1	0.5	5	1	2	15	1	16024635	0	7000000	0	23024635	9656404	17799139	2.65548e+06	4.29256e+06	1987438	1.18977e+07	4.53095e+06	287596	62290.6	43450.8	37422	0	428299	859058	3.4335e+06	80	104	1	13368231	33	17	1049	279	42535	184	1040	39	502
6	6	300000	10110	2			57	1	29	2	7	1	2	2	25	1	24134633	0	5000000	0	29134633	4914863	29134633	4.91144e+06	6.96374e+06	0	1.14633e+07	5.66995e+06	324997	31700	20000	174254	20000	833920	1.40487e+06	5.55887e+06	76	158	2	1.92853e+07	80	7	2712	479	86327	200	1799	58	737
7	5	245275	8266	1	17	4	17	1	36	1	4	2	1	2	45	1	17123808	0	4200000	0	21323808	6.20837e+06	2.35641e+07	7.55934e+06	5.84528e+06	0	9477190	4.78618e+06	382920	52087.6	3577.82	120850	97905.9	857171	1.51451e+06	4.33077e+06	80	124	2	1.60035e+07	77	5	1970	300	39775	150	1554	53	503
8	5	500000	16850	1	3	2	24	1	30	2	4	1	2	2	15	1	20548540	0	7000000	0	27548540	10038484	25336225	8189941	4793548	0	16029471	5025447	200000	49000	0	40000	85000	500000	874000	3919548	73	128	3	17146284	31	4	2316	516	52298	267	2114	68	851
9	4	129984	4380	1	15	3	70	1	32	2	4	3	2	2	28	1	15263604	0	3000000	0	18263604	5301022	1.81857e+07	1.68834e+07	7.84886e+07	0	1.21702e+07	3.99147e+06	263972	62135.9	95155.3	80794	96842.7	350411	949310	8.65393e+07	60	99	1	12962582	20	5	802	163	28543	78	1421	37	278
10	5	135512	4567	1	15	3	96	1	29	2	0.17	0.3	1	1	20	1	13638110	0	2942000	0	16580110	15217000	1.65071e+07	9.88493e+06	2.77582e+06	396215	6622153	3.43815e+06	214042	60619.1	32910.7	6238	0	490163	803973	1.97185e+06	69	82	0	13638110	24	5	954	140	28102	80	1303	23	243
11	9	500000	16850	1	18	3	82	1	40	1	3	3	1	1	30	1	19507254	0	9120000	0	28627254	12071428	2.66957e+07	1.01399e+07	6.96603e+06	0	1.54642e+07	4.77235e+06	175997	69000	147875	53278.6	0	589700	1.03585e+06	5.93018e+06	74	142	1	1.65558e+07	36	5	2373	426	58274	69	2100	107	602
12	2	218000	7347	2			95	1	35	1	3	5	2	2	10	1	8621855	0	12500000	0	21121855	15955143	8.78592e+06	3.79891e+06	2.60392e+06	0	3.53016e+06	762500	116257	136084	0	8250.85	0	102482	363072	2.24085e+06	70	82	3	4.98701e+06	34	7	393	99	22831	53	2008	27	179
13	7	348362	11740	1	4	2	99	1	30	1	2	3	2	1	30	1	16441160	0	5239770	0	21680930	13344624	2.07322e+07	1.25256e+07	4.13442e+06	13577.2	7.30386e+06	4.00407e+06	178571	50035	14409	0	103869	640545	987429	3.14699e+06	73	125	3	8206580	34	3	1121	214	20408	9	948	35	258
14	5	172213	5804	2			27	1	32	1	2	0.8	1	1	5	1	15448384	0	19560384	0	19560384	6413022	16783730	4918310	3450492	0	1.05602e+07	3438307	204464	56814	105268	108000	111520	188383	846449	2604043	75	100	2	11865420	29	4	789	186	39301	135	2330	41	362
15	6	153482	5172	2			40	1	34	1	0.5	1.2	1	1	15	1	16098591	0	4609429	0	20708020	6666563	1.94685e+07	5.74699e+06	4.15107e+06	122475	1.22122e+07	3.97709e+06	151642	70819	193549	77997	526367	278490	1.29886e+06	2.85721e+06	56	105	0	1.37215e+07	45	5	838	107	40780	152	1915	28	287
[truncated: 7 more columns]
